1 **Parsing propagule pressure: Number, not size, of introductions drives colonization**  
2 **success in a novel environment**

3 Michael J Koontz<sup>a,b,c,1</sup>, Meagan F Oldfather<sup>d,2</sup>, Brett A Melbourne<sup>e,3</sup>, Ruth A Hufbauer<sup>b,c,4</sup>

4

5 a. Graduate Group in Ecology, University of California, Davis, CA 95616

6 b. Graduate Degree Program in Ecology, Colorado State University, Fort Collins, CO 80523

7 c. Department of Bioagricultural Science and Pest Management, Colorado State University, Fort  
8 Collins, CO 80523

9 d. Department of Integrative Biology, University of California, Berkeley, CA 94720

10 e. Department of Ecology and Evolutionary Biology, University of Colorado, Boulder, CO  
11 80309

12 **Running header:** Parsing propagule pressure

13

14

15

16

17

18

19

---

<sup>1</sup> Email: [mkoontz@ucdavis.edu](mailto:mkoontz@ucdavis.edu); ORCID: [orcid.org/0000-0002-8276-210X](https://orcid.org/0000-0002-8276-210X)

<sup>2</sup> Email: [meagan\\_oldfather@berkeley.edu](mailto:meagan_oldfather@berkeley.edu); ORCID: [orcid.org/0000-0003-3256-4786](https://orcid.org/0000-0003-3256-4786)

<sup>3</sup> Email: [brett.melbourne@colorado.edu](mailto:brett.melbourne@colorado.edu)

<sup>4</sup> Email: [hufbauer@colostate.edu](mailto:hufbauer@colostate.edu)

## 20 **ABSTRACT**

21 Predicting whether individuals will colonize a novel habitat is of fundamental ecological interest  
22 and is crucial to both conservation efforts and invasive species management. A consistently  
23 supported predictor of colonization success is the number of individuals introduced, also called  
24 propagule pressure. Propagule pressure increases with the number of introductions and the  
25 number of individuals per introduction (the size of the introduction), but it is unresolved which  
26 process is a stronger driver of colonization success. Furthermore their relative importance may  
27 depend upon the environment, with multiple introductions potentially enhancing colonization of  
28 fluctuating environments. To evaluate the relative importance of the number and size of  
29 introductions and its dependence upon environmental variability, we paired demographic  
30 simulations with a microcosm experiment. Using *Tribolium* flour beetles as a model system, we  
31 introduced a fixed number of individuals into replicated novel habitats of stable or fluctuating  
32 quality, varying the number of introductions through time and size of each introduction. We  
33 evaluated establishment probability and the size of extant populations after 7 generations. In the  
34 simulations and microcosms, we found that establishment probability increased with more,  
35 smaller introductions, but was not affected by biologically realistic fluctuations in environmental  
36 quality. Population size was not significantly affected by environmental variability in the  
37 simulations, but populations in the microcosms grew larger in a stable environment, especially  
38 with more introduction events. In general, the microcosm experiment yielded higher  
39 establishment probability and larger populations than the demographic simulations. We suggest  
40 that genetic mechanisms likely underlie these differences and thus deserve more attention in  
41 efforts to parse propagule pressure. Our results highlight the importance of preventing further  
42 introductions of undesirable species to invaded sites, and suggest conservation efforts should

43 focus on increasing the number of introductions or re-introductions of desirable species rather  
44 than increasing the size of those introduction events.

45 **KEYWORDS:** invasion, reintroduction, propagule pressure, biocontrol, conservation,  
46 microcosm, population dynamics, stochasticity, simulation

## 47 **INTRODUCTION**

48 Colonization is the ecologically fundamental process of population establishment in an  
49 unoccupied site, and it underlies the past, present, and future distributions of species.

50 Colonization occurs naturally, but is increasingly prevalent due to anthropogenic influences  
51 (Sakai et al. 2001, Cassey et al. 2005, Ricciardi 2007). Incipient populations often face  
52 environments that are entirely novel, which is especially likely in the case of anthropogenic  
53 colonization (Cassey et al. 2005, Ricciardi 2007). Regardless of whether colonization events to  
54 novel habitats are natural (e.g., range expansion) or human-mediated (e.g., biological invasions,  
55 reintroductions of rare species, release of biological control agents), their successes or failures  
56 have significant implications for natural resource managers and society (Mack et al. 2000).

57 Most introductions to novel habitats fail, and colonization success can be difficult to predict  
58 (Lockwood et al. 2005, Zenni and Nuñez 2013). Incipient populations are commonly small, and  
59 face threats from environmental, demographic, and genetic stochasticity (Lande 1988, 1993,  
60 Fauvergue et al. 2012). Furthermore, the success of any given population can be idiosyncratic  
61 with respect to taxonomy and geography (Lodge 1993, Lockwood et al. 2005). Thus, it is crucial  
62 to understand more general features of the colonization process beyond the particular invading  
63 organism or the particular invaded environment (Lockwood et al. 2005). Propagule pressure is

64 one such general feature that is a consistent predictor of colonization success in novel habitats  
65 (Lockwood et al. 2005, Colautti et al. 2006, Simberloff 2009, Jeschke 2014).

66 Propagule pressure is the total number of potentially reproductive individuals (e.g., adults, eggs,  
67 seeds, vegetative material) introduced to an area (Novak 2007). It is often described in this broad  
68 sense, which belies its complexity. Two important components of propagule pressure are the  
69 number of introduction events— sometimes termed propagule number, and the number of  
70 individuals per introduction event— sometimes termed propagule size (*sensu* Fauvergue et al.  
71 2012). Here, we use “introduction regime” to refer to different combinations of the number of  
72 introduction events and the number of individuals introduced per event. The same total  
73 propagule pressure,  $N$ , is realized by different introduction regimes depending on how those  $N$   
74 individuals are distributed in time or space (Haccou and Iwasa 1996). An introduction regime of  
75  $N$  individuals lies on a continuum bounded by maximizing the number of individuals introduced  
76 per event (all  $N$  individuals introduced in one event to the same location) and maximizing the  
77 number of introduction events (one individual introduced in each of  $N$  sequential events through  
78 time or to each of  $N$  unique locations).

79 Colonization success increases with total propagule pressure, but it is unclear whether the  
80 correlation is driven by the number of individuals introduced per event or the number of  
81 introduction events (Lockwood et al. 2005, Colautti et al. 2006, Simberloff 2009). Historical data  
82 suggest that multiple introductions can facilitate population establishment, but conclusions from  
83 these studies are limited by the inability to control for the total number of individuals introduced  
84 (Hopper and Roush 1993, Blackburn and Duncan 2001, Grevstad et al. 2011, Fauvergue et al.  
85 2012). Models that hold the total propagule pressure constant agree that multiple, small  
86 introductions distributed across space will lead to greater establishment probability compared to

87 a single, large introduction when Allee effects are weak (Haccou and Iwasa 1996, Grevstad 1999,  
88 Schreiber and Lloyd-Smith 2009). However, both modeling and empirical approaches have  
89 generated conflicting views on how an introduction regime affects colonization success when  
90 introductions are distributed through time, a situation in which individuals from later  
91 introductions interact both demographically and genetically with individuals from previous  
92 introductions.

93 There is evidence from both models and experiments that colonization success can increase with  
94 more, smaller introduction events through time. Branching process models show that, in the long  
95 run, several small introductions will be more likely to successfully establish a population than a  
96 single large introduction (Haccou and Iwasa 1996, Haccou and Vatutin 2003). This finding was  
97 corroborated by simulations with no Allee effects (Drolet and Locke 2016). In a *Daphnia*  
98 microcosm experiment, increasing introduction frequency (proportional to the number of  
99 introductions) positively affected population growth, but the number of individuals per  
100 introduction had no detectable effect (Drake et al. 2005). Establishment probability was only  
101 affected by total propagule pressure, and did not increase with increasing introduction frequency  
102 (Drake et al. 2005). However, Drake et al. (2005) did not continue scheduled introductions if a  
103 population went extinct, denying those populations one of the main benefits of repeated  
104 introductions and creating variability in the total propagule pressure. In a more recent experiment,  
105 several small introductions through time led to a 65% increase in abundance of successfully  
106 colonizing invasive Pacific Oyster (*Crassostrea gigas*) compared to a single large introduction  
107 (Hedge et al. 2012).

108 There is contrasting evidence from both models and experiments that colonization success  
109 increases with fewer, larger introduction events through time. In simulations of bird invasions, a

110 single large introduction event always led to the greatest establishment probability (Cassey et al.  
111 2014). When Drolet and Locke (2016) included Allee effects in their simulations, their  
112 previously observed pattern reversed and colonization success was instead more likely with  
113 fewer, larger introductions than with more, smaller introductions. In a field experiment with the  
114 psyllid biocontrol agent, *Arytainilla spartiophila*, the number of individuals per introduction  
115 event was a better predictor of establishment success than the number of introduction events  
116 (Memmott et al. 2005). In this case however, the introduction regimes with the most individuals  
117 per event also had the highest total propagule pressure (Memmott et al. 2005). In an experiment  
118 that controlled total propagule pressure, a single, large introduction of the non-native mysid,  
119 *Hemimysis anomala*, led to larger populations and greater survival probabilities compared to  
120 several, small introductions through time (Sinclair and Arnott 2016).

121 Environmental stochasticity in the recipient environment may also affect which introduction  
122 regime is optimal for colonization. Branching process models show that a more variable  
123 environment reduces the probability of population establishment for all introduction regimes  
124 (Haccou and Iwasa 1996, Haccou and Vatutin 2003), and simulations of introductions distributed  
125 in space suggest that greater environmental variability will magnify the benefit of multiple  
126 introductions (Grevstad 1999). However, simulations of introductions through time by Cassey et  
127 al. (2014) did not support either of these outcomes— a single, large introduction was most likely  
128 to establish a population even with extreme levels of environmental stochasticity.

129 Thus, modeling and empirical approaches have not resolved how different introduction regimes  
130 with a fixed total propagule pressure will affect colonization success when introductions are  
131 distributed through time. Further, there has been no experimental test of whether variability in  
132 the recipient environment interacts with the introduction regime to affect colonization. We paired

133 demographic simulations with a laboratory microcosm experiment using the red flour beetle,  
134 *Tribolium castaneum*, to reconcile conflicts in the literature and test how different introduction  
135 regimes implemented through time affect colonization success in novel habitats. We explicitly  
136 manipulated whether the novel habitat was stable or randomly fluctuating in quality to assess  
137 how the success of different introduction regimes may depend upon variability in the recipient  
138 environment. With the total number of individuals introduced held constant at 20, we varied the  
139 size and number of introduction events used to distribute those individuals in four different  
140 introduction regimes. We evaluated establishment probability and population size over 7 discrete  
141 generations to ask: 1) does colonization success increase with more introduction events or with  
142 more individuals per introduction event?, and 2) does the effect of the introduction regime on  
143 colonization success depend on whether the recipient novel environment is stable or fluctuating  
144 through time?

## 145 **METHODS**

### 146 *General Framework*

147 In simulations and a microcosm experiment, we evaluated the outcome of introducing 20 total  
148 individuals to one of two environmental contexts (a stable or fluctuating novel environment),  
149 varying the number of introduction events used to distribute those individuals through time. This  
150 total propagule pressure was low enough to allow some population extinction within an  
151 observable timeframe, but high enough to be representative of documented introductions in the  
152 literature (Simberloff 1989, Simberloff 2009; Grevstad 1999; Berggren 2001; Taylor et al. 2005;  
153 Drake et al. 2005). The introduction regimes were: 20 individuals introduced in the first  
154 generation, 10 individuals introduced in each of the first 2 generations, 5 individuals introduced

155 in each of the first 4 generations, and 4 individuals introduced in each of the first 5 generations.  
156 To create the fluctuating environment, we imposed a magnitude of variability corresponding to  
157 environmental stochasticity in nature, which leads to frequent, mild to moderate perturbations in  
158 population growth rate due to external forces (Lande 1993). Populations were tracked for seven  
159 generations following the initial introduction.

160 Establishment probability and the size of established populations were used as measures of  
161 colonization success. Populations were deemed ‘established’ for any time step in which they  
162 were extant and population size was noted for all extant populations in every time step.  
163 Establishment probability and mean population size were assessed in generation 7.

#### 164 *Study System*

165 Our simulations and microcosm experiment use *Tribolium castaneum* (red flour beetles) to  
166 model the life history of organisms with discrete, non-overlapping generations (e.g., annual  
167 insects and fishes) following Melbourne and Hastings (2008). Individual simulated colonists  
168 were randomly sourced from a randomly mating, infinitely large population. Individual  
169 experimental colonists came from a thoroughly mixed source population maintained at 800  
170 individuals in each of the 4 temporal blocks over which the experiment was replicated. To obtain  
171 colonists, beetles from the source population were mixed freely on a plate, selected from many  
172 sections of the plate, and introduced to subsets of the experiment populations in a random order  
173 (about 24 subsets per block). All migrant females were assumed to arrive mated from the source  
174 population. The strong maternal effects exhibited by *Tribolium* flour beetles were reduced by  
175 rearing individuals from the source population on novel growth medium for 1 generation prior to  
176 using them as colonists (Van Allen and Rudolf 2013, Hufbauer et al. 2015).



177 *Simulations*

178 Population dynamics were simulated with a Negative Binomial-Binomial gamma (NBBg) Ricker  
 179 model (Melbourne and Hastings 2008) with an additional mating function of the form:

$$N_{t+1,i} \sim \text{NegBinom}(\mu_i, k_D F_{mated(t,i)})$$

$$\mu_i = \frac{F_{mated(t,i)}}{p} R_{E_i} e^{-\alpha N_{t,i}}$$

$$R_{E_i} \sim \text{Gamma}\left(k_E, \frac{R_0}{k_E}\right)$$

$$N_{t,i} = N_{migrants(t,i)} + N_{residents(t,i)}$$

$$F_{mated(t,i)} = \begin{cases} F_{migrants(t,i)}, & F_{migrants(t,i)} + F_{residents(t,i)} = N_{t,i} \\ F_{migrants(t,i)} + F_{residents(t,i)}, & F_{migrants(t,i)} + F_{residents(t,i)} < N_{t,i} \end{cases}$$

$$F_{migrants(t,i)} \sim \text{Binom}(N_{migrants(t,i)}, p)$$

$$F_{residents(t,i)} \sim \text{Binom}(N_{residents(t,i)}, p)$$

$$p = 0.5$$

$$R_0 \sim \text{Gamma}(2.6, 1)$$

$$\alpha \sim \text{Gamma}(0.0037, 1)$$

$$k_E \sim \text{Gamma}(17.6, 1)$$

$$k_D \sim \text{Gamma}(1.07, 1)$$

(Eq. 1)

180

181 Where  $N_{t+1,i}$  is the size of population  $i$  at time  $t+1$ ,  $k_D$  represents stochasticity due to  
 182 demographic heterogeneity,  $\mu_i$  is the expectation of the size of population  $i$  in the next time step,  
 183  $F_{mated(t,i)}$  is the latent number of mated females in population  $i$  at time  $t$ ,  $p$  is the probability of an  
 184 individual being female,  $R_{E_i}$  is the latent density-independent population growth rate for  
 185 environment  $E$ ,  $\alpha$  is the egg cannibalism rate,  $N_{t,i}$  is the total size of population  $i$  at time  $t$ ,  $k_E$   
 186 represents environmental stochasticity,  $R_0$  is the density-independent population growth rate for

187 the average environment,  $N_{migrants(t,i)}$  is the total number of migrants to population  $i$  at time  $t$ , and  
188  $N_{residents(t,i)}$  is the total number of residents in population  $i$  at time  $t$ .

189 We imposed a mating function such that a population would deterministically go extinct if it  
190 comprised only non-migrant females. In cases with an all female population and a mixture of  
191 residents and migrants, we only included the number of migrant females in the density-  
192 dependent effect of the demographic heterogeneity term  $k_D * F_{mated(t,i)}$  because this effect  
193 manifests via the number of eggs laid by females and only migrant females, being pre-mated,  
194 would lay eggs. Weakly regularizing gamma priors were taken from Melbourne and Hastings  
195 (2008). The expected equilibrium population size for the model is:

$$K = \frac{\log(R_0)}{\alpha} \quad (\text{Eq. 2})$$

196  
197 For each combination of the 4 introduction regimes and 2 recipient environment types (described  
198 above), we simulated 500,000 replicate populations for 7 generations. All simulations were  
199 performed in R (R Core Team 2016). This model captures the stochastic and deterministic  
200 ecological dynamics of the *Tribolium* system well, but does not include evolutionary processes  
201 (Melbourne and Hastings 2008, Hufbauer et al. 2015).

202 To parameterize the model, we censused 125 *Tribolium* populations one generation after  
203 establishing them at various, known densities (between 5 and 200 individuals) on the novel  
204 growth medium following the rearing procedure described in “Microcosm Experiment” below.  
205 We fit the hierarchical model (Eq. 1) to these data in a Bayesian framework to generate posterior  
206 distributions for each of the parameters using the nimble package in R (de Valpine et al. 2016).  
207 We used a Metropolis-Hastings random walk sampler with 3 chains having 50,000 samples each

208 (including 10,000 samples that were removed for burn in). The chains converged (multivariate  $\hat{R}$   
209 for the 4 key parameters = 1.01) and produced a sufficient number of effective samples ( $R_0$ : 757,  
210  $\alpha$ : 548,  $k_E$ : 4103,  $k_D$ : 1703).

211 A single novel growth medium mixture was used for these 125 populations (mixture 5,  
212 Supplementary Table 1), so we treated the estimated environmental stochasticity parameter,  $k_E$ ,  
213 as the expectation for a stable environment. We parameterized a fluctuating environment model  
214 by increasing the standard deviation of the density-independent per capita population growth rate  
215 by approximately 10% for any given population at any given time step. This was accomplished  
216 by multiplying all of the samples from the posterior distribution of the environmental  
217 stochasticity parameter,  $k_E$ , by 100/121 (derived by moment matching for the gamma  
218 distribution). By using random sets of parameters drawn from the samples of the posterior  
219 distributions, we were able to propagate the model uncertainty through the simulations and  
220 combine it with the deterministic and stochastic dynamics represented by the model itself.

### 221 *Microcosm Experiment*

222 We founded 842 *Tribolium* populations with different introduction regimes (20 individuals in the  
223 first generation, 10 individuals in the first 2 generations, 5 individuals in the first 4 generations,  
224 or 4 individuals in the first 5 generations) and environments (stable or fluctuating) with between  
225 96 and 120 replicate populations per treatment combination (Supplemental Table 3). Each  
226 population was reared in a 4cm x 4cm x 6cm plastic box (AMAC Plastic Products) with 2  
227 tablespoons (approximately 15 g) of freshly prepared growth medium that had been humidified  
228 for at least 24 hours. The growth medium used for the source population (the natal environment  
229 of the colonists) comprised 95% wheat flour (Pillsbury Co. or Gold Medal Products Co.) and 5%

230 brewers' yeast (Sensient Flavors). Colonists were introduced into a novel growth medium  
231 comprising a small percentage of natal medium mixed with corn flour (Bob's Red Mill). All  
232 populations were reared in one of two dark incubators at 31° and approximately 70% relative  
233 humidity (standard conditions) and were haphazardly rotated between incubators weekly.

234 For each population in each generation, a known number of adults laid eggs for 24 hours in fresh  
235 medium, and were then removed. Offspring were given 35 days to develop, and adults were then  
236 censused. Censused adults laid eggs on freshly prepared growth medium for 24 hours,  
237 completing their laboratory life cycle. We estimated the maximum observation error during  
238 census to be 4.6% (median: 0%, mean: 0.26%) with no detectable difference across observers or  
239 populations with different sizes.

240 Each replicate population experienced a novel environment that was either stable or randomly  
241 fluctuating through time. The same novel growth medium mixture containing 99.05% novel corn  
242 flour and 0.95% natal medium (mixture 5, Supplementary Table 1) was used for the stable  
243 environment for the duration of the experiment, which preliminary results indicated would yield  
244 a population growth rate of  $\lambda = 1.2$  compared to a mean population growth rate of 3.36 on 100%  
245 natal medium. To create the fluctuating environment, we randomly selected a novel growth  
246 medium mixture from one of 9 possible media mixtures for each population in each generation.  
247 Each population in the fluctuating environment therefore experienced a unique series of  
248 environmental conditions. The 9 possible media mixtures represented a gradient of corn flour to  
249 natal medium ratios, and were designed to yield expected population growth rates between 0.88  
250 and 1.33 (Supplementary Table 1). We chose this range to mimic environmental stochasticity  
251 measured in nature (Sæther and Engen 2002) while remaining within the bounds of biologically  
252 realistic population growth ( $\lambda$  between 0.5 and 1.5) (Morris et al. 2008). The random sequence of

253 growth media was constrained such that the expected geometric mean population growth rate for  
254 each population resembled expected growth of populations in the stable environment ( $\lambda_{expected} =$   
255  $1.2 \pm 0.05$ ).

256 We estimated the amount of environmental stochasticity that we achieved in the fluctuating  
257 environment as the difference in mean total stochasticity between populations in the fluctuating  
258 and stable environments (Sæther and Engen 2002). We assumed that total stochasticity was a  
259 combination of demographic and environmental stochasticity for populations in the fluctuating  
260 environment, and that demographic stochasticity was the sole contributor to total stochasticity  
261 for populations in the stable environment. Total stochasticity (demographic plus environmental)  
262 of each population that did not experience extinction ( $n=667$ ) was calculated as the variance of  
263 the natural logarithms of its population growth rates through 7 generations:

$$s_{total} = s_{demographic} + s_{environmental} = var(\log(\lambda_t)) \quad (\text{Eq. 3})$$

264 where, for a particular population,  $s_{total}$  is its total stochasticity,  $s_{demographic}$  is its demographic  
265 stochasticity,  $s_{environmental}$  is its environmental stochasticity (assumed to be 0 for populations  
266 in the stable environment), and  $\lambda_t$  is its per capita population growth rate between generation  $t-1$   
267 and generation  $t$  ( $t=1, 2, \dots, 7$ ). We only calculated total stochasticity for populations that did  
268 not experience any extinction in order to capture the full temporal extent of environmental  
269 fluctuations and because extinctions would have an infinite effect on this measure of  
270 stochasticity.

271 *Statistical analyses*

272 We evaluated how our environment treatment affected variability in population growth rate (total  
273 stochasticity from Eq. 3) using a linear mixed effects model with environment (stable or  
274 fluctuating) as a fixed effect and block as a random intercept effect.

275 We used a mixed effects logistic regression with a logit link to predict the binary response of  
276 establishment, and a mixed effects Poisson regression with a log link to analyze population size.  
277 In both models, introduction regime, environment treatment, and their interaction were treated as  
278 fixed effects, and block was treated as a random intercept effect.

279 We assessed the effect of temporary extinctions on the establishment probability and mean  
280 population size by fitting the generalized linear mixed effects models described above to data  
281 from the multiple introduction regimes (i.e. not the 20x1 regime) and with additional predictor  
282 variables. To assess the effect of the presence of a temporary extinction, we included an  
283 additional Boolean predictor for whether a population went temporarily extinct or not. To assess  
284 the role of the total propagule pressure, we included a numeric predictor representing the number  
285 of beetles introduced after the latest temporary extinction.

286 Group-level significance of fixed effects was tested using likelihood ratio tests on nested models,  
287 and least-squares contrasts were used to compare levels of the fixed effects. All statistical  
288 analyses were performed in R, version 3.3.2 (R Core Team 2016). Generalized linear mixed  
289 models were fit using the lme4 package, version 1.1-12 (Bates et al. 2015) and pairwise  
290 comparisons were made using the lsmeans package, version 2.25 (Lenth 2016).

291 *Data availability*

292 The raw experiment data, simulated population trajectories, R code for the simulations, R code  
293 fitting the NBBg model, samples from the posterior distributions of the NBBg parameters, and R  
294 code fitting the mixed effects models are available as supplemental material, on Figshare  
295 (<https://doi.org/10.6084/m9.figshare.4648865.v1>), and on GitHub  
296 (<https://github.com/mikoontz/ppp-establishment>).

### 297 *Note on egg contamination*

298 Laboratory procedures after generation 3 resulted in occasional egg contamination between  
299 replicate populations of the same treatment. Some populations of 1 individual persisted when  
300 they should have deterministically gone extinct, so we manually edited those population  
301 trajectories such that they went extinct in the generation after having only 1 individual.

## 302 **RESULTS**

### 303 *Simulations*

304 Summary statistics for the posterior distributions of the four NBBg model parameters are given  
305 in Supplementary Table 2.

306 Our simulations showed introduction regimes with more introduction events were more likely  
307 establish a population by the seventh generation (Figure 1). Simulated introductions into a  
308 stochastically fluctuating environment resulted in slightly lower population establishment for all  
309 introduction regimes (difference of ~1%), but did not favor any particular regime (not shown).  
310 The mean population sizes for each introduction regime/environment combination were  
311 approximately equal in simulations. Mean population sizes only incorporated extant populations,  
312 so they were slightly larger than the expectation for the equilibrium population size (Figure 2).

313 *Microcosm experiment*

314 Mean environmental stochasticity of populations in the fluctuating environment was 0.052 (95%  
315 CI = 0.0073 to 0.0966;  $p = 0.023$ ). This value is near the median value of 0.055 measured in  
316 nature by Sæther and Engen (2002) in a metaanalysis of 35 avian populations, indicating that we  
317 achieved biologically realistic fluctuations in population growth rate.

318 We found no evidence that the probability of establishment was affected by a main effect of  
319 environment ( $\chi^2=0.72$ ,  $df=1$ ,  $p=0.40$ ), nor by an interaction between environment and  
320 introduction regime ( $\chi^2=3.49$ ,  $df=3$ ,  $p=0.32$ ). However, there was strong support for an effect of  
321 introduction regime on establishment probability ( $\chi^2=59.76$ ,  $df=3$ ,  $p<0.0001$ ). Pairwise  
322 comparisons of the different introduction regimes averaged across the environment treatments  
323 revealed that the 4x5 regime was the most likely to establish populations, with a probability of  
324 about 0.98, whereas the 20x1 and 10x2 regimes were the least likely to establish populations,  
325 with a probability reduced to about 0.8 (Figure 1, Figure 3).

326 The size of populations that persisted until generation 7 was shaped by significant effects of  
327 introduction regime ( $\chi^2=91.65$ ,  $df=3$ ,  $p<0.0001$ ), environment treatment ( $\chi^2=117.83$ ,  $df=3$ ,  
328  $p<0.0001$ ), and their interaction ( $\chi^2=44.62$ ,  $df=3$ ,  $p<0.0001$ ). Populations established via more  
329 introduction events were larger when averaged across the environment treatments. Extant  
330 populations in the stable environment were larger than those in the fluctuating environment when  
331 averaged across the introduction regimes. The interaction manifests as the benefit of a stable  
332 environment increases with more, smaller introduction events (Figure 2, Figure 4).

333 Extinctions accumulated regularly throughout the experiment period, with 101 out of 842  
334 populations (12.0%) going extinct by generation 7 (Figure 3). The additional introductions that



335 some populations received often restored a population that had temporarily gone extinct. Out of  
336 602 populations that received more than 1 introduction (i.e. not the 20x1 introduction regime),  
337 104 of them (17.3%) temporarily went extinct at least once before being replenished by  
338 additional colonizing individuals. Twelve populations were rescued in this way at least twice,  
339 and one population was rescued in this way three times.

340 Temporary extinctions significantly affected colonization success. The presence of a temporary  
341 extinction significantly reduced average establishment probability from 92.4% to 82.1%  
342 (difference = -1.13 on logit scale, 95% CI = -0.22 to -2.04,  $\chi^2 = 5.44$ ,  $df = 1$ ,  $p = 0.020$ ) and mean  
343 population size from 47.8 to 45.4 (difference = -0.052 on log scale, 95% CI = -0.02 to -0.09,  $\chi^2 =$   
344 9.42,  $df = 1$ ,  $p = 0.0021$ ). Each additional colonist contributing to a population after the latest  
345 temporary extinction significantly increased the mean population size (estimate = 0.005 on the  
346 log scale, 95% CI = 6.4e-05 to 0.01,  $\chi^2 = 3.94$ ,  $df = 1$ ,  $p = 0.047$ ).

347 Results from the simulations are expected to represent the dynamics in the microcosm  
348 experiment if the assumption of the model on which the simulations were built holds—that only  
349 demographic processes are responsible for the dynamics observed in the experiment. However,  
350 establishment probability at generation 7 was equal to or greater than that expected from the  
351 simulations (Figure 1) and mean population sizes were much larger in the experiment than in the  
352 simulations (Figure 2), together suggesting an influence of non-demographic mechanisms.

## 353 **DISCUSSION**

354 We assessed how the number and size of introduction events through time drive colonization  
355 success in a novel environment when the total number of individuals introduced to a site is fixed.

356 We considered novel environments that were either stable or randomly fluctuating in quality

357 through time, and evaluated populations through 7 discrete generations. We approached this  
358 question in two ways: 1) stochastic simulations of a demographic population dynamics model  
359 parameterized with empirical data, and 2) a highly replicated laboratory microcosm experiment.  
360 By coupling these approaches, we were able to expand and test the theoretical understanding of  
361 how the introduction regime affects colonization in stable and fluctuating environments as well  
362 as to develop new avenues for research when observations did not align with predictions. We  
363 found that several, small introductions increase colonization success and that demographic  
364 processes alone are insufficient to explain the dynamics observed in the experiment.

365 We found minimal to no effect of a biologically realistic level of environmental stochasticity on  
366 establishment probability in demographic simulations or in the microcosm experiment. Our  
367 results corroborate those of Cassey et al. (2014) who simulated introductions through time and  
368 also found a minimal effect of environmental stochasticity on establishment probability. Cassey  
369 et al. (2014) further found a minimal effect of random, infrequent catastrophes and bonanzas,  
370 suggesting that increasing temporal environmental variability in the broadest sense (i.e.,  
371 encompassing environmental stochasticity, random catastrophes, and bonanzas) does not  
372 magnify the benefit of several, small introductions through time. A minimal role of  
373 environmental stochasticity contrasts with the results of Grevstad (1999) who found with  
374 simulations that several, small introductions would produce an especially high establishment  
375 probability compared to a single, large introduction in a variable environment. The difference in  
376 findings is perhaps due to a difference in the kinds of introduction regimes modeled: Grevstad  
377 (1999) simulated multiple introductions in space with strong environmental stochasticity often  
378 leading to catastrophic mortality, while we focused on introductions separated in time with less

379 extreme environmental stochasticity leading to moderate fluctuations in growth rates (Lande  
380 1993).

381 There also did not appear to be a strong effect of environmental stochasticity on population size  
382 in the demographic simulations. All treatments in the simulations reached similar mean  
383 population size by generation 7, which was slightly higher than the equilibrium size due to our  
384 measure only including extant populations. This suggests that strong density dependence in the  
385 demographic simulations was the primary influence on population size.

386 Population growth rate may interact with introduction regime to affect colonization success.  
387 Cassey et al. (2014) suggested that their lower simulated mean population growth rates, where  $R$   
388 was between 1.0 and 1.38, compared to that of Grevstad (1999), where  $R$  was equal to 2.0,  
389 explained why they found that a single large introduction always led to a greater establishment  
390 probability, while Grevstad (1999) found several small introductions to be more successful.  
391 Further, Wittmann et al. (2014) show that population establishment occurs faster with fewer  
392 larger introductions in populations with growth rates below one or with growth rates that  
393 fluctuate above and below one. Wittmann et al. (2014) also show that population establishment is  
394 faster with several smaller introductions when population growth rate is consistently greater than  
395 one. However, our expected mean population growth rate was relatively low ( $R = 1.132$ ;  
396 Supplementary Table 2) and we still found that several small introductions had the greatest  
397 colonization success. Also, several small introductions performed best in both the fluctuating  
398 environment (population growth fluctuated above and below one; Supplementary Table 1) and in  
399 the stable environment (population growth consistently greater than one; Supplementary Table 1)  
400 (Figure 1, Figure 2). Thus, our results contradict the notion that net reproductive rate is the key

401 control on how introduction regime affects colonization success, which merits further  
402 investigation.

403 We observed striking differences in the measures of colonization success between the microcosm  
404 experiment and the demographic simulations. We found that establishment probability increased  
405 with the number of introduction events in both the experiment and the simulations, but that all  
406 experiment establishment probabilities equaled or exceeded expectations from simulations. In  
407 the experiment, mean population size in stable environments was greater than in fluctuating  
408 environments, and there was an interaction between environment and introduction regime  
409 whereby the mean population size was increasingly greater in stable compared to fluctuating  
410 environments as the number of introductions increased. Furthermore, populations grew larger by  
411 generation 7 in the experiment than in the simulations.

412 Differences between the results of the simulations and of the microcosm experiment suggest that  
413 the demographic processes captured by the model do not account for all of the biological  
414 processes that occurred in the microcosm. Recent work shows that adaptation to the novel, harsh  
415 environment from standing variation is possible in this species (Hufbauer et al. 2015), and likely  
416 explains the greater establishment probability and population sizes in the microcosm compared  
417 to expectations derived from demographic simulations which do not include adaptation.

418 The rescue effect of immigration can act demographically by increasing the size of populations  
419 (Hufbauer et al. 2015). Certainly, demographic rescue played a critical role for the 104  
420 populations that went extinct temporarily until another introduction event revived them. Those  
421 temporary extinctions had lasting effects on colonization success. Colonization success declined  
422 for populations that experienced a temporary extinction, and the mean population size

423 significantly increased if more colonists contributed to the population after a temporary  
424 extinction. These results reflect the overarching importance of total propagule pressure  
425 regardless of introduction regime.

426 The rescue effect can also act genetically by increasing the fitness of populations (Frankham  
427 2015, Hufbauer et al. 2015, Whiteley et al. 2015). The experimental immigrants all came from  
428 the same source population, so it is unlikely that gene flow from migrants united previously  
429 separated alleles into high-fitness genotypes (Novak 2007). Thus, a more likely mechanism by  
430 which immigration increased mean population size beyond expectations was by relieving  
431 inbreeding depression or counteracting drift-induced allele loss. Small populations are more  
432 prone to experiencing increased homozygosity and inbreeding depression, which can reduce  
433 population growth rates and increase extinction risk (McCauley and Wade 1981, O'Grady et al.  
434 2006, Szűcs et al. 2017). Even small amounts of gene flow can alleviate these effects, so the  
435 additional small introductions of mated individuals from the external source population were  
436 well-suited to bring about longer-term relief (Slatkin 1985, Hufbauer et al. 2015). However,  
437 Cassey et al. (2014) found that simulated inbreeding depression was especially detrimental for  
438 several, small introductions through time, so other mechanisms are likely at play.

439 One such mechanism may be adaptation of the incipient population, which is affected by  
440 sustained immigration. Introductions to a harsh, novel habitat can result in adaptive evolution  
441 with the right amount of gene flow if additional immigrants to a declining population prevent  
442 extinction long enough to allow for adaptation to occur (Holt and Gomulkiewicz 1997). However,  
443 too much gene flow can lead to genetic swamping whereby the homogenizing effects of gene  
444 flow overpowers ongoing local adaptation (Lenormand 2002). This may have been the case for  
445 populations in the 10x2 introduction regime, which had the highest average migration rate,

446 lowest establishment probability, and lowest mean population size. Alternatively, negative  
447 density dependence may have reduced population fitness when migration rates were high,  
448 reducing population growth rates and hampering the spread of adaptive alleles (Holt and  
449 Gomulkiewicz 1997). Though not significant, the lower establishment probability and mean  
450 population size in the 10x2 introduction regime warrants further work to assess whether they  
451 exemplify the yet-unseen scenario described by Blackburn et al. (2015) in which maladaptive  
452 gene flow from multiple introductions hampers population establishment in a novel range. More  
453 broadly, further study is necessary to evaluate how immigration affected adaptation in this  
454 system, if at all (Gomulkiewicz and Holt 1995, Boulding and Hay 2001).

## 455 **CONCLUSION**

456 Our experimental results suggest that several, small introductions through time lead to greater  
457 colonization success in a novel habitat, and that introductions into a stable recipient environment  
458 lead to larger population sizes, but not greater establishment probability. Further, introductions to  
459 a stable recipient environment are especially beneficial to populations established with more  
460 introduction events. These results defied our expectations derived from parallel simulations of a  
461 model that included demographic processes but not evolutionary ones, so we suspect a genetic  
462 mechanism might be at work. Genetic mechanisms are rarely incorporated when simulating the  
463 effect of introduction regime on colonization (but see Cassey et al. 2014), and our multi-  
464 generation microcosm is unique in bringing evolutionary processes to bear on parsing two key  
465 components of propagule pressure in an experimental setting.

466 For invasions, our results highlight the importance of preventing further introductions to the  
467 same location, even for established species. For conservation and biological control, our results

468 suggest that emphasis should be placed on increasing the number of introductions or re-  
469 introductions to a location, rather than increasing the size of those events if Allee effects are  
470 weak. Sustained introduction efforts should also bring about concomitant benefits in the form of  
471 longer-term monitoring, increased data collection, and more opportunities for experimentation  
472 and adaptive management (Lockwood et al. 2005, Godefroid et al. 2011).

### 473 **ACKNOWLEDGMENTS**

474 We thank Charlotte Hoover, Kaitlyn Adkins, Mary Catherine Cochran, Don Waters, Stacy  
475 Endriss, Marianna Szűcs, and Jenny Rickford for help with data collection. Funding was  
476 provided by NSF Graduate Research Fellowship Grants #DGE-1321845 Amend. 3 (to MJK) and  
477 #DGE-1106400 (to MFO), NSF Grant DEB-0949619 (to RAH), and NSF Grant DEB-0949595  
478 (to BAM). RAH also acknowledges the support of the USDA via the Colorado Experiment  
479 Station. We thank the lab groups of Ruth Hufbauer, Paul Ode, Andrew Norton, Andrew Latimer,  
480 Truman Young, and Jenny Gremer for comments on the project and manuscript.

### 481 **REFERENCES**

- 482 Bates, D. et al. 2015. Fitting linear mixed-effects models using lme4. - J. Stat. Softw. 67: 1–48.
- 483 Berggren, A. 2001. Colonization success in Roesel’s bush-cricket *Metrioptera roeseli*: The  
484 effects of propagule size. - Ecology 82: 274–280.
- 485 Blackburn, T. M. and Duncan, R. P. 2001. Establishment patterns of exotic birds are constrained  
486 by non-random patterns in introduction. - J. Biogeogr. 28: 927–939.
- 487 Blackburn, T. M. et al. 2015. The influence of numbers on invasion success. - Mol. Ecol.: 1–12.

- 488 Boulding, E. G. and Hay, T. 2001. Genetic and demographic parameters determining population  
489 persistence after a discrete change in the environment. - *Heredity* (Edinb). 86: 313–24.
- 490 Cassey, P. et al. 2005. Concerning invasive species: Reply to Brown and Sax. - *Austral Ecol.* 30:  
491 475–480.
- 492 Cassey, P. et al. 2014. A population model for predicting the successful establishment of  
493 introduced bird species. - *Oecologia* 175: 417–428.
- 494 Colautti, R. I. et al. 2006. Propagule pressure: A null model for biological invasions. - *Biol.*  
495 *Invasions* 8: 1023–1037.
- 496 de Valpine, P. et al. 2016. Programming with models: writing statistical algorithms for general  
497 model structures with NIMBLE. - *J. Comput. Graph. Stat.* 8600: 1–20.
- 498 Drake, J. M. et al. 2005. Propagule pressure and persistence in experimental populations. - *Biol.*  
499 *Lett.* 1: 480–3.
- 500 Drolet, D. and Locke, A. 2016. Relative importance of propagule size and propagule number for  
501 establishment of non-indigenous species: A stochastic simulation study. - *Aquat. Invasions*  
502 11: 101–110.
- 503 Fauvergue, X. et al. 2012. The biology of small, introduced populations, with special reference to  
504 biological control. - *Evol. Appl.* 5: 424–43.
- 505 Frankham, R. 2015. Genetic rescue of small inbred populations: Meta-analysis reveals large and  
506 consistent benefits of gene flow. - *Mol. Ecol.* 24: 2610–2618.
- 507 Godefroid, S. et al. 2011. How successful are plant species reintroductions? - *Biol. Conserv.* 144:



- 508           672–682.
- 509   Gomulkiewicz, R. and Holt, R. D. 1995. When does evolution by natural selection prevent  
510           extinction? - *Evolution* (N. Y). 49: 201–207.
- 511   Grevstad, F. S. 1999. Factors influencing the chance of population establishment: Implications  
512           for release strategies in biocontrol. - *Ecol. Appl.* 9: 1439–1447.
- 513   Grevstad, F. S. et al. 2011. Revisiting release strategies in biological control of weeds: Are we  
514           using enough releases? - *XIII Int. Symp. Biol. Control Weeds*: 368–376.
- 515   Haccou, P. and Iwasa, Y. 1996. Establishment probability in fluctuating environments: A  
516           branching process model. - *Theor. Popul. Biol.* 50: 254–280.
- 517   Haccou, P. and Vatutin, V. 2003. Establishment success and extinction risk in autocorrelated  
518           environments. - *Theor. Popul. Biol.* 64: 303–314.
- 519   Hedge, L. H. et al. 2012. Manipulating the intrinsic parameters of propagule pressure:  
520           Implications for bio-invasion. - *Ecosphere* 3: 1–13.
- 521   Holt, R. D. and Gomulkiewicz, R. 1997. How does immigration influence local adaptation? A  
522           reexamination of a familiar paradigm. - *Am. Nat.* 149: 563–572.
- 523   Hopper, K. R. and Roush, R. T. 1993. Mate finding, dispersal, number released, and the success  
524           of biological control introductions. - *Ecol. Entomol.* 18: 321–331.
- 525   Hufbauer, R. A. et al. 2015. Three types of rescue can avert extinction in a changing  
526           environment. - *Proc. Natl. Acad. Sci.* 112: 10557–10562.
- 527   Jeschke, J. M. 2014. General hypotheses in invasion ecology. - *Divers. Distrib.* 20: 1229–1234.

- 528 Lande, R. 1988. Genetics and demography in biological conservation. - *Science* 241: 1455–1460.
- 529 Lande, R. 1993. Risks of population extinction from demographic and environmental  
530 stochasticity and random catastrophes. - *Am. Nat.* 142: 911–927.
- 531 Lenormand, T. 2002. Gene flow and the limits to natural selection. - *Trends Ecol. Evol.* 17: 183–  
532 189.
- 533 Lenth, R. V 2016. Least-squares means: The R package lsmeans. - *J. Stat. Softw.* 69: 1–33.
- 534 Lockwood, J. L. et al. 2005. The role of propagule pressure in explaining species invasions. -  
535 *Trends Ecol. Evol.* 20: 223–8.
- 536 Lodge, D. M. 1993. Biological invasions: Lessons for ecology. - *Trends Ecol. Evol.* 8: 133–137.
- 537 Mack, R. N. et al. 2000. Biotic invasions: Causes, epidemiology, global consequences, and  
538 control. - *Ecol. Appl.* 10: 689–710.
- 539 McCauley, D. E. and Wade, M. J. 1981. The populational effects of inbreeding in *Tribolium*. -  
540 *Heredity (Edinb.)* 46: 59–67.
- 541 Melbourne, B. A. and Hastings, A. 2008. Extinction risk depends strongly on factors  
542 contributing to stochasticity. - *Nature* 454: 100–3.
- 543 Memmott, J. et al. 2005. The effect of propagule size on the invasion of an alien insect. - *J. Anim.*  
544 *Ecol.* 74: 50–62.
- 545 Morris, W. F. et al. 2008. Longevity can buffer plant and animal populations against changing  
546 climatic variability. - *Ecology* 89: 19–25.

- 547 Novak, S. J. 2007. The role of evolution in the invasion process. - Proc. Natl. Acad. Sci. 104:  
548 3671–2.
- 549 O’Grady, J. J. et al. 2006. Realistic levels of inbreeding depression strongly affect extinction risk  
550 in wild populations. - Biol. Conserv. 133: 42–51.
- 551 R Core Team 2016. R: A language and environment for statistical computing. [http://www.r-](http://www.r-project.org/)  
552 [project.org/](http://www.r-project.org/). in press.
- 553 Ricciardi, A. 2007. Are modern biological invasions an unprecedented form of global change? -  
554 Conserv. Biol. 21: 329–36.
- 555 Sæther, B.-E. and Engen, S. 2002. Pattern of variation in avian population growth rates. - Philos.  
556 Trans. R. Soc. Lond. B. Biol. Sci. 357: 1185–95.
- 557 Sakai, A. K. et al. 2001. The population biology of invasive species. - Annu. Rev. Ecol. Syst. 32:  
558 305–332.
- 559 Schreiber, S. J. and Lloyd-Smith, J. O. 2009. Invasion dynamics in spatially heterogeneous  
560 environments. - Am. Nat. 174: 490–505.
- 561 Simberloff, D. 1989. Which insect introductions succeed and which fail? - In: Drake et al., J. A.  
562 (ed), Biological Invasions: a Global Perspective. John Wiley & Sons Ltd, pp. 61–75.
- 563 Simberloff, D. 2009. The role of propagule pressure in biological invasions. - Annu. Rev. Ecol.  
564 Evol. Syst. 40: 81–102.
- 565 Sinclair, J. S. and Arnott, S. E. 2016. Strength in size not numbers: Propagule size more  
566 important than number in sexually reproducing populations. - Biol. Invasions 18: 497–505.

- 567 Slatkin, M. 1985. Gene flow in natural populations. - *Annu. Rev. Ecol. Syst.* 16: 393–430.
- 568 Szűcs, M. et al. 2017. Genetic and demographic founder effects have long-term fitness  
569 consequences for colonising populations. - *Ecol. Lett.*: 1–7.
- 570 Taylor, S. S. et al. 2005. Successful island reintroductions of New Zealand robins and  
571 saddlebacks with small numbers of founders. - *Anim. Conserv.* 8: 415–420.
- 572 Van Allen, B. G. and Rudolf, V. H. W. 2013. Ghosts of habitats past: Environmental carry-over  
573 effects drive population dynamics in novel habitat. - *Am. Nat.* 181: 596–608.
- 574 Whiteley, A. R. et al. 2015. Genetic rescue to the rescue. - *Trends Ecol. Evol.* 30: 42–49.
- 575 Wittmann, M. J. et al. 2014. Decomposing propagule pressure: the effects of propagule size and  
576 propagule frequency on invasion success. - *Oikos* 123: 441–450.
- 577 Zenni, R. D. and Nuñez, M. A. 2013. The elephant in the room: The role of failed invasions in  
578 understanding invasion biology. - *Oikos* 122: 801–815.
- 579

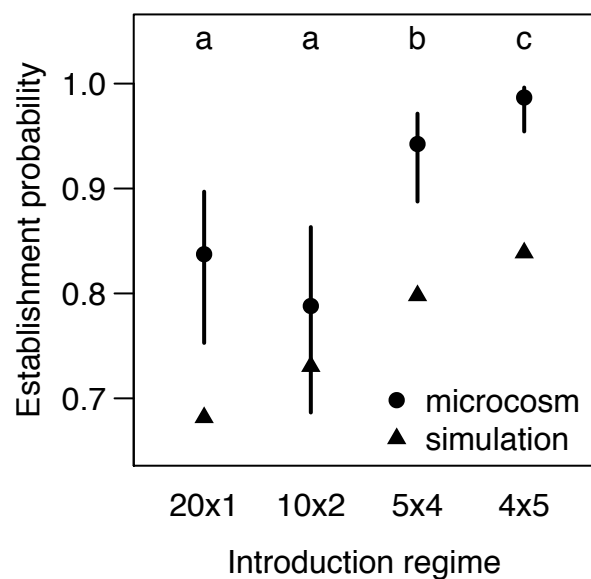

580

581 **Figure 1.** Establishment probabilities for each introduction regime assessed at generation 7.

582 Triangles represent results from simulations. Dot-whiskers represent estimates and 95%

583 confidence intervals from the mixed effects logistic regression model fit to data from the

584 microcosm experiment. Different letters over dot-whiskers represent introduction regimes with

585 significantly different establishment probabilities in the microcosm experiment.

586

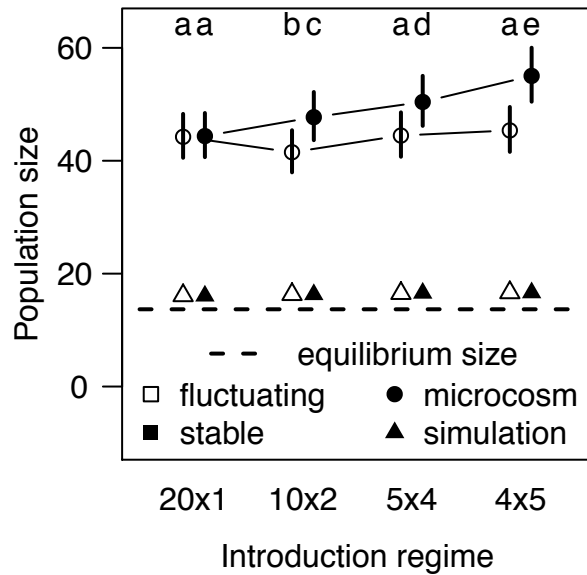

587

588 **Figure 2.** Mean sizes of extant populations for each introduction regime/environment  
589 combination in generation 7. Triangles represent results from simulations. Dot-whiskers  
590 represent estimates and 95% confidence intervals from the mixed effects Poisson regression  
591 model fit to data from the microcosm experiment. Different letters over dot-whiskers represent  
592 introduction regimes with significantly different mean population sizes. The dashed line  
593 represents the theoretical equilibrium population size derived using Eq. 2, which includes  
594 extinction and is therefore lower than the mean population size from the simulations.

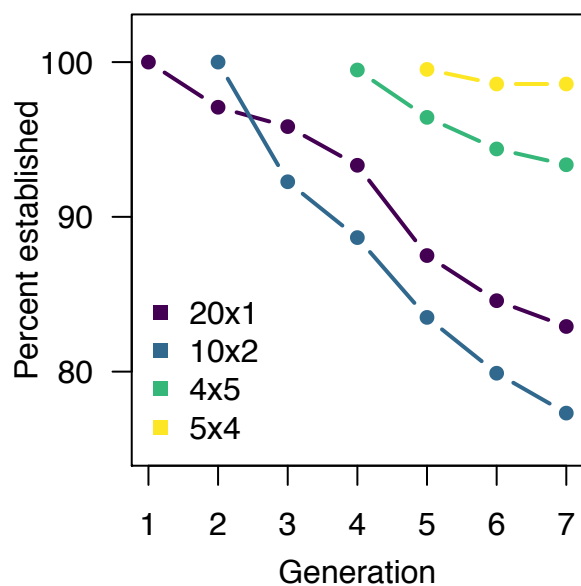

595

596 **Figure 3.** Percent of microcosm populations that were established in each generation for the 4  
597 different introduction regimes. Data are pooled across the two environmental variability  
598 treatments. The introduction regimes are as follows: 20x1 = 20 individuals in the first generation,  
599 10x2 = 10 individuals in each of the first two generations, 5x4 = 5 individuals in each of the first  
600 4 generations, and 4x5 = 4 individuals in each of the first 5 generations.

601

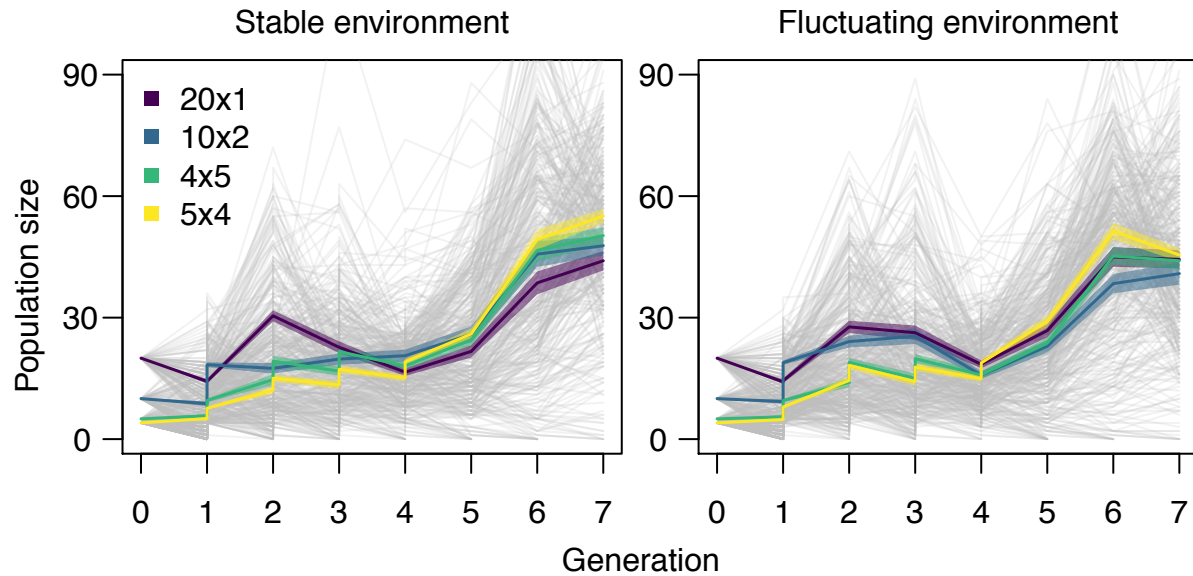

602

603 **Figure 4.** Population trajectories for 842 populations of *Tribolium* in the microcosm experiment.

604 The first panel represents all populations in stable environments ( $n = 418$ ) and the second panel

605 represents all populations in fluctuating environments ( $n = 424$ ). Vertical steps in the population

606 size represent additional migrant individuals in introduction regimes with more than 1

607 introduction. Light grey lines represent individual population trajectories, and colored lines

608 represent the mean size of extant populations for each of the 4 introduction regimes. The

609 introduction regimes are as follows:  $20 \times 1 = 20$  individuals in the first generation,  $10 \times 2 = 10$

610 individuals in each of the first two generations,  $5 \times 4 = 5$  individuals in each of the first 4

611 generations, and  $4 \times 5 = 4$  individuals in each of the first 5 generations. Shading around the

612 colored lines represents the mean size of extant populations plus and minus one standard error.
